# Supplementary material for: Manipulating trap distribution and density by chemical unit cosubstitution for near-infrared persistent luminescent Zn1−2xLixGa2+xO4:Cr3+ solid solutions
Source: Royal Society of Chemistry journal article supplement (doi:10.1039/d2tc03741f), 2022-01-01
Supplement: d2tc03741f1.pdf [file d2tc03741f1.pdf]

### Supporting Information

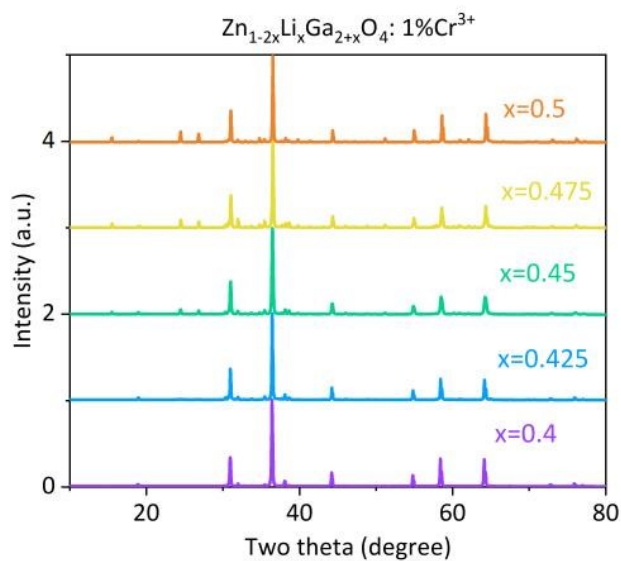

Figure S1. XRD patterns of  $\text{Zn}_{1-2x}\text{Li}_x\text{Ga}_{2+x}\text{O}_4:\text{Cr}^{3+}$  solid solutions ( $x = 0.4, 0.425, 0.45, 0.475, 0.5$ ).

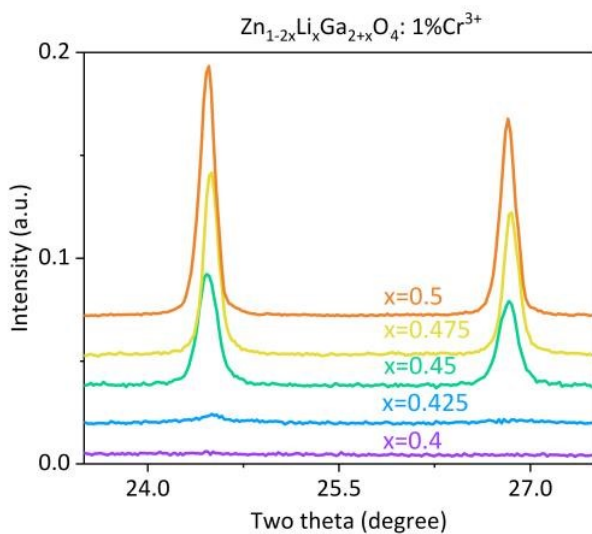

Figure S2. Zoom-in area of XRD patterns of  $\text{Zn}_{1-2x}\text{Li}_x\text{Ga}_{2+x}\text{O}_4:\text{Cr}^{3+}$  solid solutions ( $x = 0.4, 0.425, 0.45, 0.475, 0.5$ ) in the range from 24 ° to 27 °.

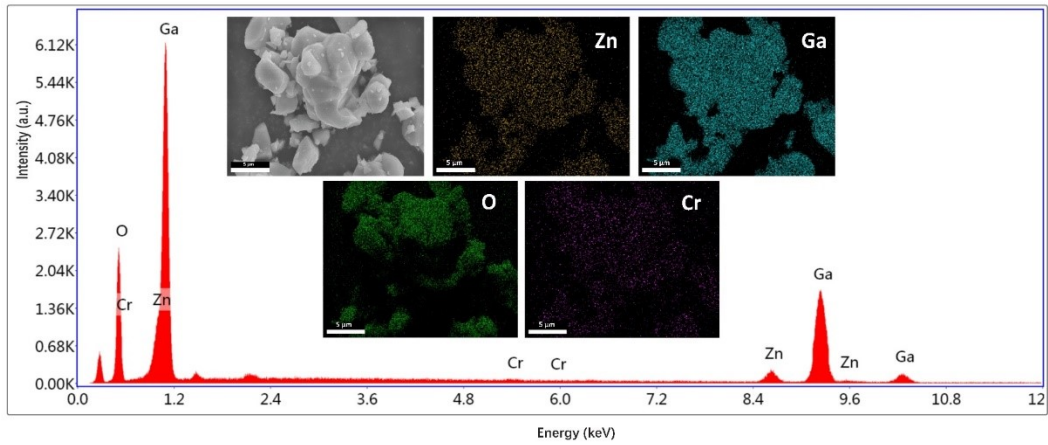

Figure S3. EDS analysis and the selected elemental distribution mappings of solid solution ( $x = 0.25$ )

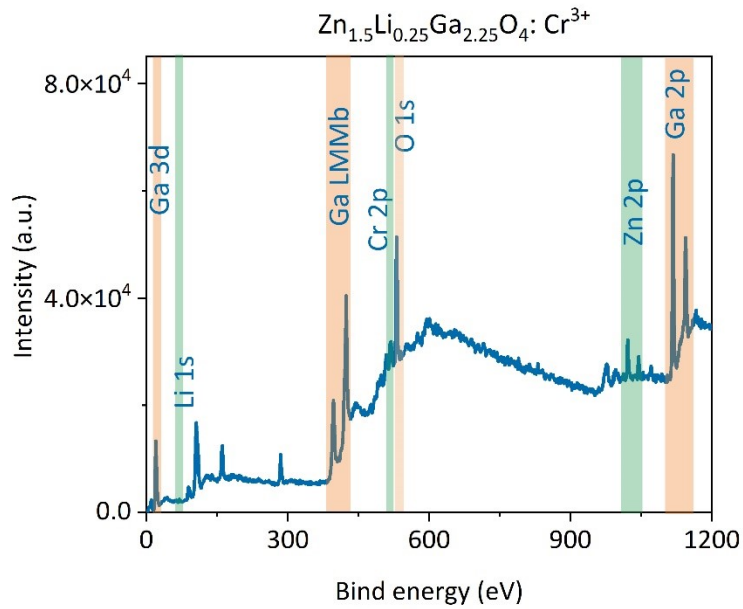

Figure S4 X-ray photoelectron spectroscopy survey of  $\text{Zn}_{1-2x}\text{Li}_x\text{Ga}_{2+x}\text{O}_4:\text{Cr}^{3+}$  ( $x = 0.25$ ) phosphor.

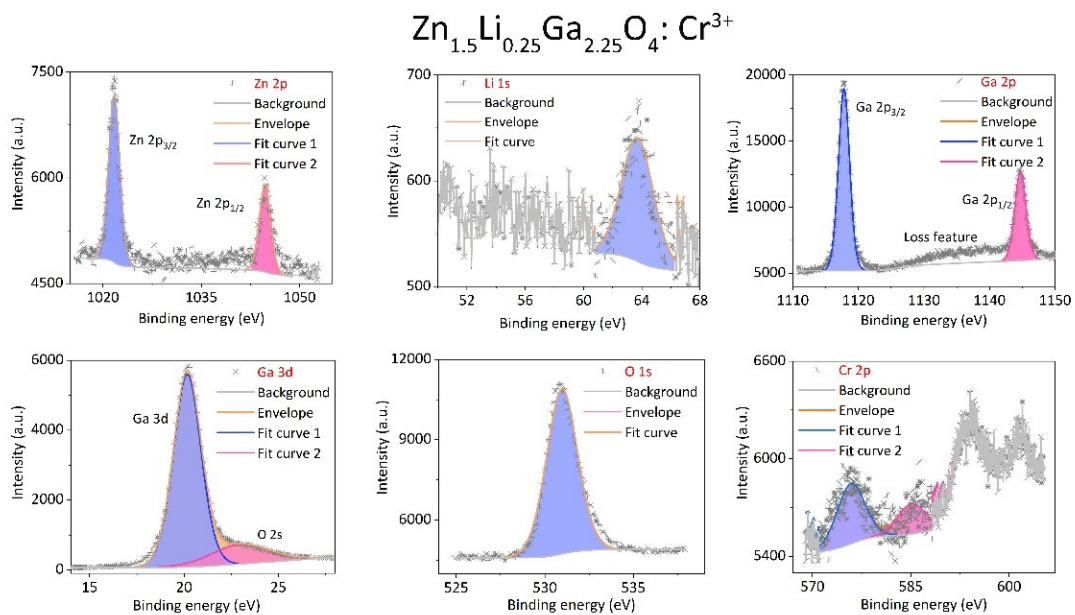

**Figure S5.** X-ray photoelectron spectroscopy analysis of the surface elemental contents. The corresponding fitting curves of each element were given.

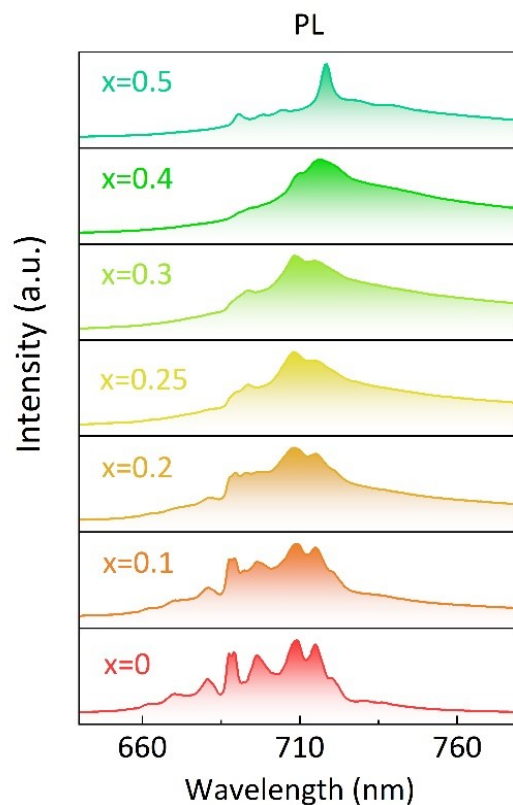

**Figure S6.** A comparison of photoluminescence (PL) spectra of  $\text{Zn}_{1-2x}\text{Li}_x\text{Ga}_{2+x}\text{O}_4:\text{Cr}^{3+}$  solid solutions

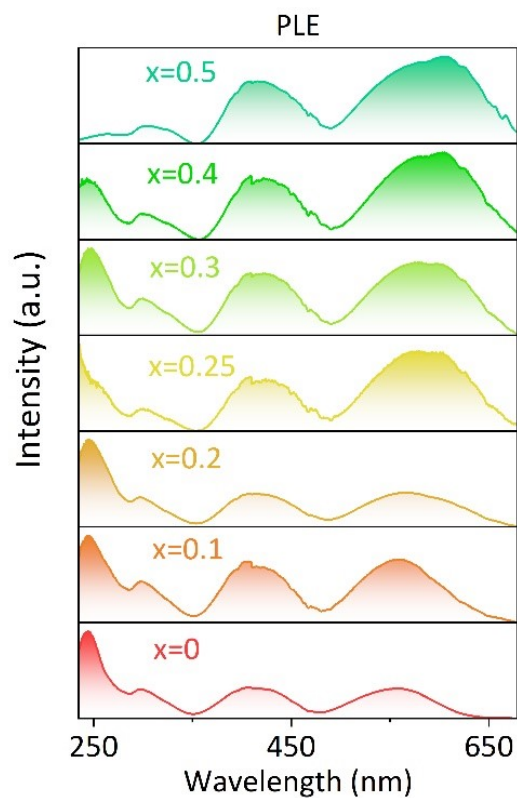

Figure S7. A comparison of photoluminescence excitation (PLE) spectra of  $\text{Zn}_{1-2x}\text{Li}_x\text{Ga}_{2+x}\text{O}_4:\text{Cr}^{3+}$  solid solutions

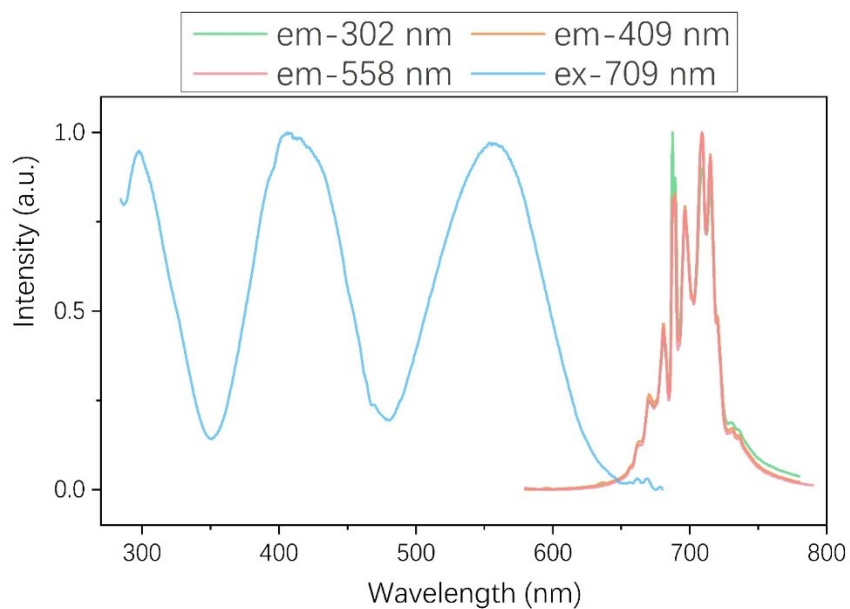

Figure S8. Photoluminescence excitation (PLE) spectrum and photoluminescence (PL) spectra of  $\text{Zn}_{1-2x}\text{Li}_x\text{Ga}_{2+x}\text{O}_4:\text{Cr}^{3+}$  ( $x = 0$ ). PLE spectrum was monitored at 709 nm. PL spectra were monitored at 302, 409 and 558 nm, respectively.

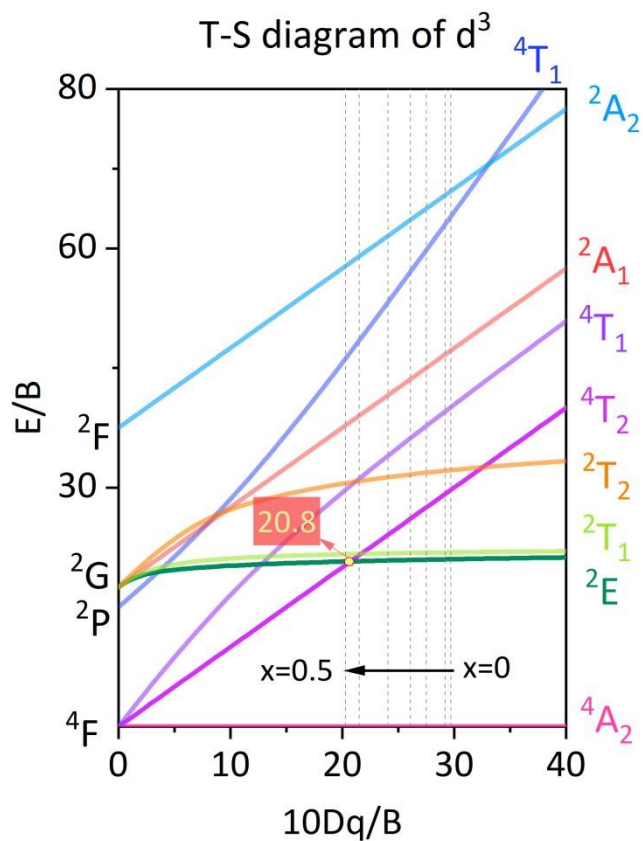

Figure S9. Tanabe–Sugano diagram of  $d^3$  ions.

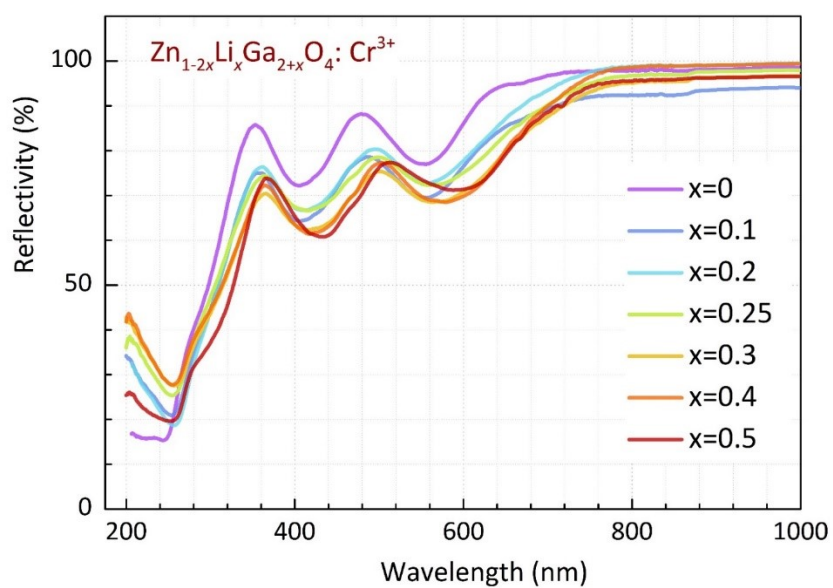

Figure S10. Diffuse reflection spectra of  $Zn_{1-2x}Li_xGa_{2+x}O_4:Cr^{3+}$  solid solutions ( $x = 0, 0.1, 0.2, 0.25,$

0.3, 0.4, 0.5).

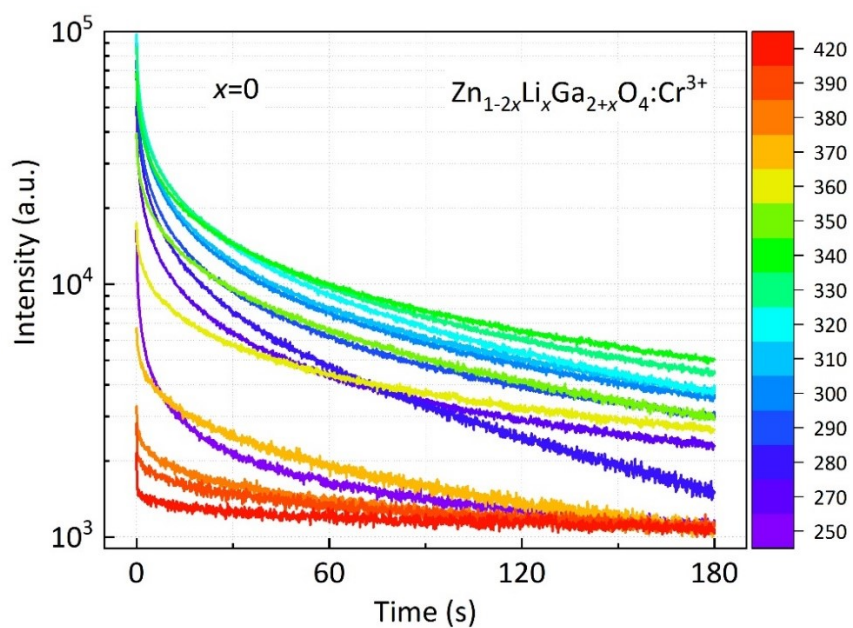

Figure S11. Charging-wavelength dependent persistent luminescence decay with  $x = 0$

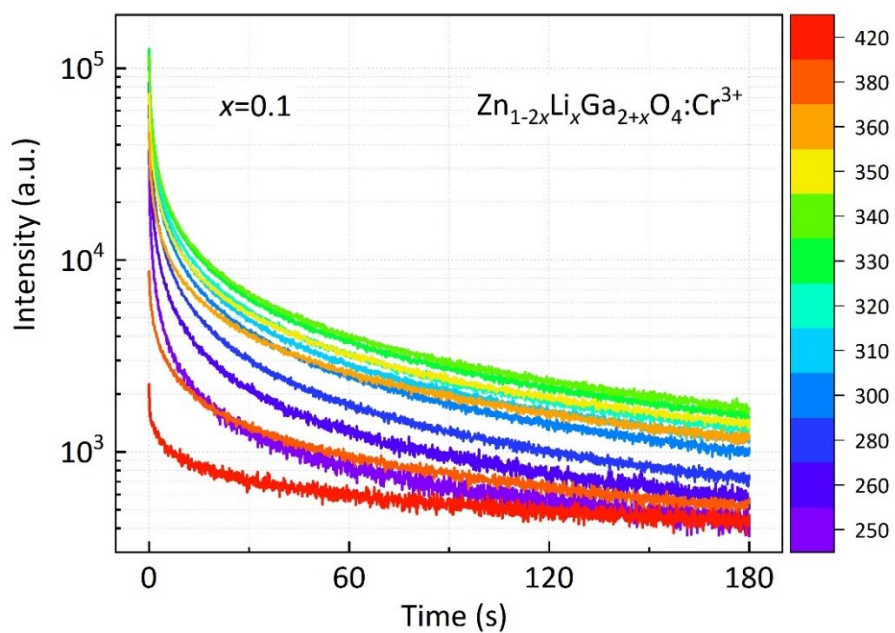

Figure S12. Charging-wavelength dependent persistent luminescence decay with  $x = 0.1$

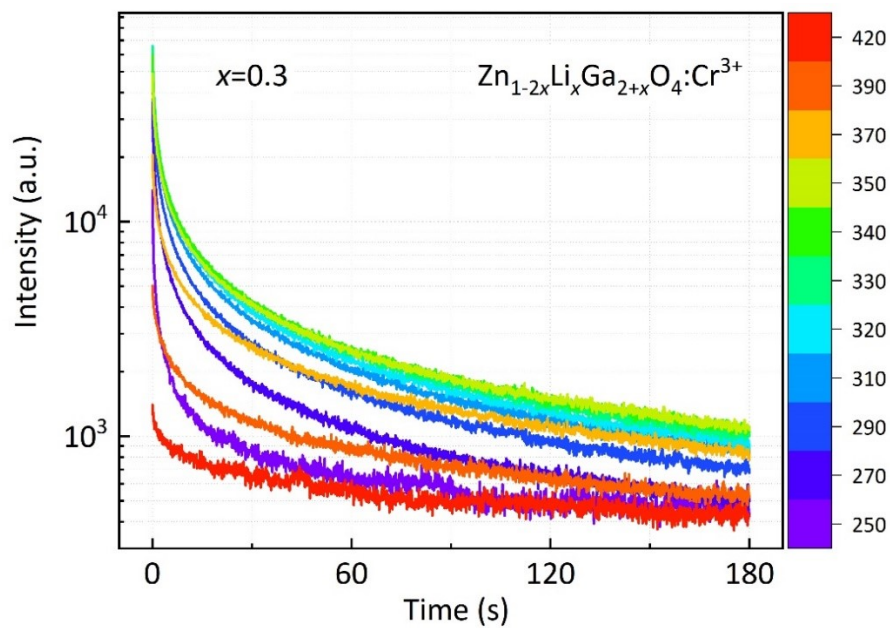

Figure S13. Charging-wavelength dependent persistent luminescence decay with  $x = 0.3$

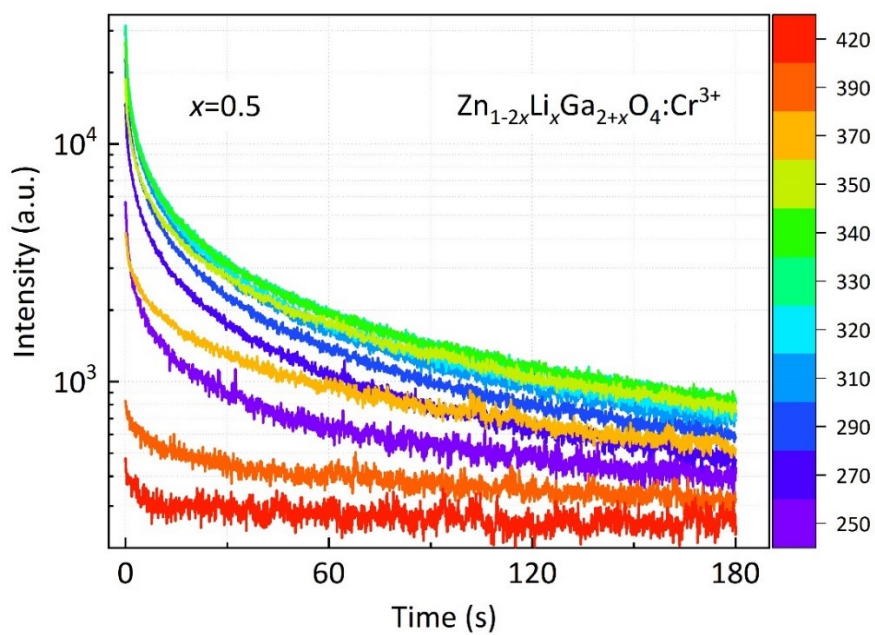

Figure S14. Charging-wavelength dependent persistent luminescence decay with  $x = 0.5$

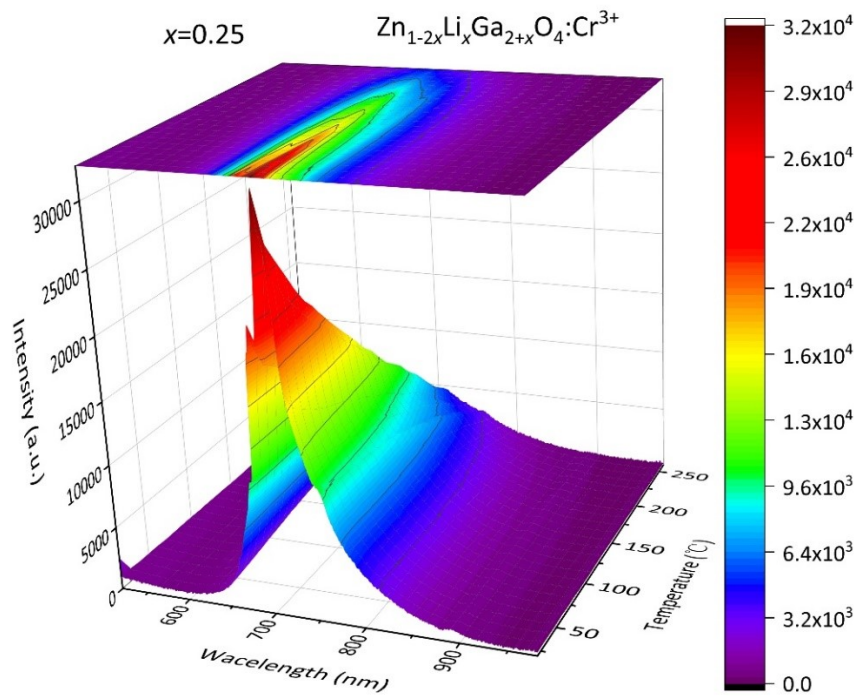

Figure S15. Temperature dependent PL spectra of  $\text{Zn}_{1-2x}\text{Li}_x\text{Ga}_{2+x}\text{O}_4:\text{Cr}^{3+}$  ( $x = 0.25$ ).



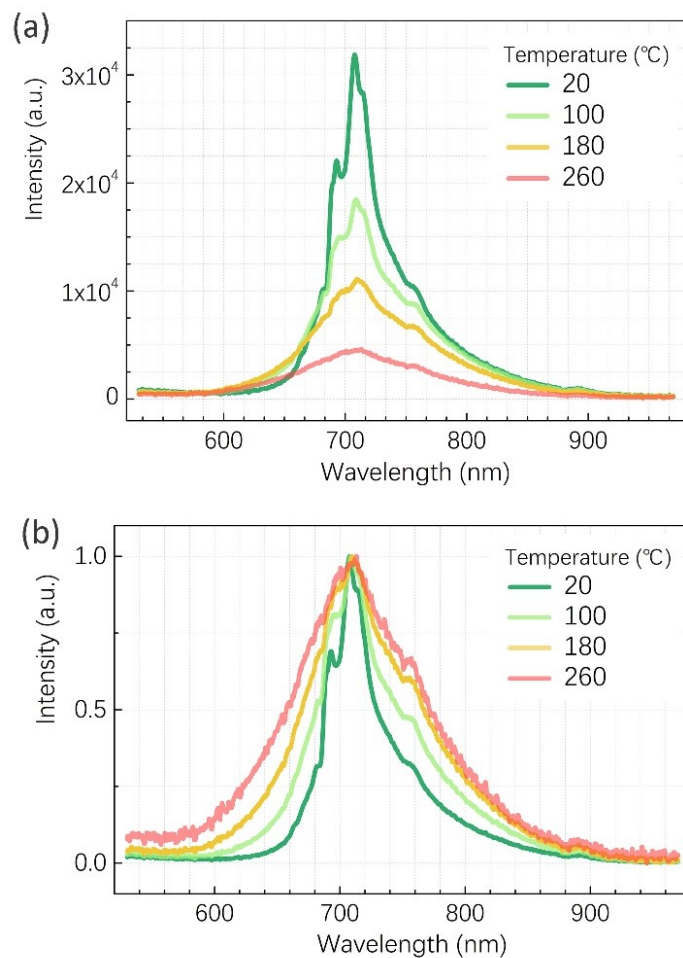

Figure S16. Comparison of PL spectra (a), normalized PL spectra (b) of  $\text{Zn}_{1-2x}\text{Li}_x\text{Ga}_{2+x}\text{O}_4:\text{Cr}^{3+}$  ( $x = 0.25$ ) at 20 °C, 100 °C, 180 °C, and 260 °C, respectively.

Table S1. The calculated crystal field parameters of each composition

|                           | 0      | 0.1    | 0.2    | 0.25   | 0.3    | 0.4    | 0.5    |
|---------------------------|--------|--------|--------|--------|--------|--------|--------|
| ${}^4\text{T}_1$ (nm)     | 412    | 412    | 414    | 418    | 416    | 417    | 414    |
| ${}^4\text{T}_2$ (nm)     | 556    | 558    | 568    | 580    | 587    | 603    | 606    |
| $Dq$ ( $\text{cm}^{-1}$ ) | 1799   | 1792   | 1761   | 1724   | 1704   | 1658   | 1650   |
| $x$                       | 3.4943 | 3.5439 | 3.7189 | 3.8760 | 4.1096 | 4.4614 | 4.6381 |
| $Dq/B$                    | 2.97   | 2.92   | 2.75   | 2.61   | 2.41   | 2.15   | 2.03   |
